# Supplementary material
Source: publisher figshare collection journal article supplement (https://acs.figshare.com/ndownloader/files/4698124)
Supplement: Supplementary file 1 [file 4698124]

data_a

 

_audit_creation_method            SHELXL-97

_chemical_name_systematic

;

 ?

;

_chemical_name_common             ?

_chemical_melting_point           ?

_chemical_formula_moiety          ?

_chemical_formula_sum

 'C182 H182 Cd17 S30'

_chemical_formula_weight          5241.88

 

loop_

 _atom_type_symbol

 _atom_type_description

 _atom_type_scat_dispersion_real

 _atom_type_scat_dispersion_imag

 _atom_type_scat_source

 'C'  'C'   0.0033   0.0016

 'International Tables Vol C Tables 4.2.6.8 and 6.1.1.4'

 'H'  'H'   0.0000   0.0000

 'International Tables Vol C Tables 4.2.6.8 and 6.1.1.4'

 'S'  'S'   0.1246   0.1234

 'International Tables Vol C Tables 4.2.6.8 and 6.1.1.4'

 'Cd'  'Cd'  -0.8075   1.2024

 'International Tables Vol C Tables 4.2.6.8 and 6.1.1.4'

 

_symmetry_cell_setting            Hexagonal

_symmetry_space_group_name_H-M    P6(2)22

 

loop_

 _symmetry_equiv_pos_as_xyz

 'x, y, z'

 '-y, x-y, z+2/3'

 '-x+y, -x, z+1/3'

 '-x, -y, z'

 'y, -x+y, z+2/3'

 'x-y, x, z+1/3'

 'y, x, -z+2/3'

 'x-y, -y, -z'

 '-x, -x+y, -z+1/3'

 '-y, -x, -z+2/3'

 '-x+y, y, -z'

 'x, x-y, -z+1/3'

 

_cell_length_a                    27.919(2)

_cell_length_b                    27.919(2)

_cell_length_c                    30.995(5)

_cell_angle_alpha                 90.00

_cell_angle_beta                  90.00

_cell_angle_gamma                 120.00

_cell_volume                      20923(4)

_cell_formula_units_Z             3

_cell_measurement_temperature     273(2)

_cell_measurement_reflns_used     5701

_cell_measurement_theta_min       2.23

_cell_measurement_theta_max       15.34

 

_exptl_crystal_description        ?

_exptl_crystal_colour             ?

_exptl_crystal_size_max           ?

_exptl_crystal_size_mid           ?

_exptl_crystal_size_min           ?

_exptl_crystal_density_meas       0

_exptl_crystal_density_diffrn     1.248

_exptl_crystal_density_method     'not measured'

_exptl_crystal_F_000              7710

_exptl_absorpt_coefficient_mu     1.523

_exptl_absorpt_correction_type    none

_exptl_absorpt_correction_T_min   ?

_exptl_absorpt_correction_T_max   ?

_exptl_absorpt_process_details    ?

 

_exptl_special_details

;

 ?

;

 

_diffrn_ambient_temperature       273(2)

_diffrn_radiation_wavelength      0.71073

_diffrn_radiation_type            MoK\a

_diffrn_radiation_source          'fine-focus sealed tube'

_diffrn_radiation_monochromator   graphite

_diffrn_measurement_device_type   'CCD area detector'

_diffrn_measurement_method        'phi and omega scans'

_diffrn_detector_area_resol_mean  ?

_diffrn_standards_number          ?

_diffrn_standards_interval_count  ?

_diffrn_standards_interval_time   ?

_diffrn_standards_decay_%         ?

_diffrn_reflns_number             46771

_diffrn_reflns_av_R_equivalents   0.1226

_diffrn_reflns_av_sigmaI/netI     0.0477

_diffrn_reflns_limit_h_min        -20

_diffrn_reflns_limit_h_max        20

_diffrn_reflns_limit_k_min        -20

_diffrn_reflns_limit_k_max        20

_diffrn_reflns_limit_l_min        -23

_diffrn_reflns_limit_l_max        23

_diffrn_reflns_theta_min          0.84

_diffrn_reflns_theta_max          15.42

_reflns_number_total              3062

_reflns_number_gt                 2666

_reflns_threshold_expression      >2sigma(I)

 

_computing_data_collection        'Bruker SMART'

_computing_cell_refinement        'Bruker SMART'

_computing_data_reduction         'Bruker SAINT'

_computing_structure_solution     'SHELXS-97 (Sheldrick, 1990)'

_computing_structure_refinement   'SHELXL-97 (Sheldrick, 1997)'

_computing_molecular_graphics     'Bruker SHELXTL'

_computing_publication_material   'Bruker SHELXTL'

 

_refine_special_details

;

 Refinement of F^2^ against ALL reflections.  The weighted R-factor wR and

 goodness of fit S are based on F^2^, conventional R-factors R are based

 on F, with F set to zero for negative F^2^. The threshold expression of

 F^2^ > 2sigma(F^2^) is used only for calculating R-factors(gt) etc. and is

 not relevant to the choice of reflections for refinement.  R-factors based

 on F^2^ are statistically about twice as large as those based on F, and R-

 factors based on ALL data will be even larger.

;

 

_refine_ls_structure_factor_coef  Fsqd

_refine_ls_matrix_type            full

_refine_ls_weighting_scheme       calc

_refine_ls_weighting_details

 'calc w=1/[\s^2^(Fo^2^)+(0.2000P)^2^+0.0000P] where P=(Fo^2^+2Fc^2^)/3'

_atom_sites_solution_primary      direct

_atom_sites_solution_secondary    difmap

_atom_sites_solution_hydrogens    geom

_refine_ls_hydrogen_treatment     mixed

_refine_ls_extinction_method      SHELXL

_refine_ls_extinction_coef        0.064(7)

_refine_ls_extinction_expression

 'Fc^*^=kFc[1+0.001xFc^2^\l^3^/sin(2\q)]^-1/4^'

_refine_ls_abs_structure_details

 'Flack H D (1983), Acta Cryst. A39, 876-881'

_refine_ls_abs_structure_Flack    0.7(3)

_refine_ls_number_reflns          3062

_refine_ls_number_parameters      137

_refine_ls_number_restraints      7

_refine_ls_R_factor_all           0.1736

_refine_ls_R_factor_gt            0.1516

_refine_ls_wR_factor_ref          0.4248

_refine_ls_wR_factor_gt           0.4061

_refine_ls_goodness_of_fit_ref    1.944

_refine_ls_restrained_S_all       1.943

_refine_ls_shift/su_max           0.595

_refine_ls_shift/su_mean          0.031

 

loop_

 _atom_site_label

 _atom_site_type_symbol

 _atom_site_fract_x

 _atom_site_fract_y

 _atom_site_fract_z

 _atom_site_U_iso_or_equiv

 _atom_site_adp_type

 _atom_site_occupancy

 _atom_site_symmetry_multiplicity

 _atom_site_calc_flag

 _atom_site_refinement_flags

 _atom_site_disorder_assembly

 _atom_site_disorder_group

Cd1 Cd 1.0000 0.5000 0.1667 0.111(4) Uani 1 4 d S . .

Cd2 Cd 0.8773(2) 0.5401(2) 0.16719(17) 0.157(4) Uani 1 1 d . . .

Cd3 Cd 1.0029(2) 0.6090(2) 0.0755(2) 0.173(4) Uani 1 1 d . . .

Cd4 Cd 0.8844(2) 0.4414(2) 0.06893(15) 0.148(3) Uani 1 1 d . . .

Cd5 Cd 0.84704(19) 0.5614(2) 0.04554(17) 0.137(3) Uani 1 1 d . . .

S6 S 0.7992(6) 0.5984(11) 0.0000 0.153(10) Uani 1 2 d S . .

S7 S 0.9404(5) 0.5221(4) 0.1193(4) 0.082(5) Uani 1 1 d . . .

S8 S 0.8221(6) 0.4572(7) 0.2116(7) 0.151(8) Uani 1 1 d D . .

S5 S 1.0462(9) 0.5778(8) 0.0249(6) 0.183(9) Uani 1 1 d . . .

S4 S 0.8124(9) 0.5575(10) 0.1197(7) 0.181(9) Uani 1 1 d D . .

S3 S 0.9430(13) 0.6315(14) 0.0295(13) 0.292(19) Uani 1 1 d . . .

S2 S 0.8252(10) 0.4711(9) 0.0234(6) 0.181(9) Uani 1 1 d . . .

S1 S 1.0561(9) 0.6820(9) 0.1252(9) 0.197(10) Uani 1 1 d . . .

C8 C 0.736(3) 0.430(3) 0.117(2) 0.16(2) Uiso 1 1 d D . .

C7 C 0.752(4) 0.491(2) 0.110(4) 0.33(6) Uiso 1 1 d D . .

C5 C 0.780(4) 0.475(5) 0.242(3) 0.27(5) Uiso 1 1 d D . .

C9 C 0.749(4) 0.508(4) 0.231(3) 0.21(3) Uiso 1 1 d D . .

C6 C 0.708(7) 0.521(8) 0.257(5) 0.40(9) Uiso 1 1 d D . .

C10 C 0.679(3) 0.381(3) 0.107(2) 0.18(3) Uiso 1 1 d D . .

C1 C 0.756(5) 0.449(5) 0.289(3) 0.30(6) Uiso 1 1 d D . .

 

loop_

 _atom_site_aniso_label

 _atom_site_aniso_U_11

 _atom_site_aniso_U_22

 _atom_site_aniso_U_33

 _atom_site_aniso_U_23

 _atom_site_aniso_U_13

 _atom_site_aniso_U_12

Cd1 0.113(7) 0.114(6) 0.105(7) 0.000 0.000 0.057(4)

Cd2 0.174(6) 0.223(7) 0.134(5) 0.026(4) 0.035(4) 0.145(5)

Cd3 0.094(4) 0.170(6) 0.233(7) 0.099(5) 0.015(4) 0.048(4)

Cd4 0.176(5) 0.124(5) 0.157(5) -0.030(3) -0.061(3) 0.084(4)

Cd5 0.102(4) 0.127(5) 0.171(5) 0.021(3) -0.013(3) 0.048(3)

S6 0.138(15) 0.17(2) 0.16(2) 0.000 -0.059(15) 0.087(12)

S7 0.067(10) 0.046(9) 0.109(12) 0.005(8) 0.016(8) 0.011(8)

S8 0.062(10) 0.108(13) 0.24(2) -0.020(13) 0.021(11) 0.012(9)

S5 0.161(17) 0.155(18) 0.162(17) -0.021(14) -0.029(14) 0.026(14)

S4 0.172(18) 0.21(2) 0.21(2) 0.095(18) 0.052(16) 0.133(17)

S3 0.24(3) 0.24(3) 0.39(4) 0.15(3) -0.03(3) 0.12(3)

S2 0.21(2) 0.158(17) 0.152(17) -0.011(13) -0.062(14) 0.071(16)

S1 0.18(2) 0.161(19) 0.28(3) 0.084(18) 0.077(19) 0.114(17)

 

_geom_special_details

;

 All esds (except the esd in the dihedral angle between two l.s. planes)

 are estimated using the full covariance matrix.  The cell esds are taken

 into account individually in the estimation of esds in distances, angles

 and torsion angles; correlations between esds in cell parameters are only

 used when they are defined by crystal symmetry.  An approximate (isotropic)

 treatment of cell esds is used for estimating esds involving l.s. planes.

;

 

loop_

 _geom_bond_atom_site_label_1

 _geom_bond_atom_site_label_2

 _geom_bond_distance

 _geom_bond_site_symmetry_2

 _geom_bond_publ_flag

Cd1 S7 2.516(12) 9_765 ?

Cd1 S7 2.516(12) 12 ?

Cd1 S7 2.516(12) . ?

Cd1 S7 2.516(12) 4_765 ?

Cd2 S8 2.462(19) . ?

Cd2 S1 2.52(2) 9_765 ?

Cd2 S7 2.538(12) . ?

Cd2 S4 2.565(19) . ?

Cd3 S1 2.39(3) . ?

Cd3 S5 2.39(2) . ?

Cd3 S3 2.50(3) . ?

Cd3 S7 2.555(12) . ?

Cd4 S7 2.537(12) . ?

Cd4 S8 2.56(2) 12 ?

Cd4 S2 2.60(2) . ?

Cd4 S5 2.63(2) 4_765 ?

Cd5 S2 2.38(2) . ?

Cd5 S3 2.45(3) . ?

Cd5 S4 2.47(2) . ?

Cd5 S6 2.493(11) . ?

S6 Cd5 2.495(11) 11_655 ?

S8 C5 1.77(5) . ?

S8 Cd4 2.56(2) 12 ?

S5 Cd4 2.63(2) 4_765 ?

S4 C7 1.79(5) . ?

S1 Cd2 2.52(2) 9_765 ?

C8 C10 1.51(4) . ?

C8 C7 1.55(5) . ?

C5 C1 1.59(5) . ?

C5 C9 1.61(5) . ?

C9 C6 1.57(5) . ?

 

loop_

 _geom_angle_atom_site_label_1

 _geom_angle_atom_site_label_2

 _geom_angle_atom_site_label_3

 _geom_angle

 _geom_angle_site_symmetry_1

 _geom_angle_site_symmetry_3

 _geom_angle_publ_flag

S7 Cd1 S7 108.6(5) 9_765 12 ?

S7 Cd1 S7 109.7(5) 9_765 . ?

S7 Cd1 S7 110.2(5) 12 . ?

S7 Cd1 S7 110.2(5) 9_765 4_765 ?

S7 Cd1 S7 109.7(5) 12 4_765 ?

S7 Cd1 S7 108.6(5) . 4_765 ?

S8 Cd2 S1 115.4(7) . 9_765 ?

S8 Cd2 S7 108.2(5) . . ?

S1 Cd2 S7 103.2(5) 9_765 . ?

S8 Cd2 S4 109.2(7) . . ?

S1 Cd2 S4 111.3(8) 9_765 . ?

S7 Cd2 S4 109.1(6) . . ?

S1 Cd3 S5 121.4(7) . . ?

S1 Cd3 S3 111.1(11) . . ?

S5 Cd3 S3 104.0(12) . . ?

S1 Cd3 S7 107.8(6) . . ?

S5 Cd3 S7 103.4(6) . . ?

S3 Cd3 S7 108.4(8) . . ?

S7 Cd4 S8 102.0(5) . 12 ?

S7 Cd4 S2 105.0(5) . . ?

S8 Cd4 S2 109.7(6) 12 . ?

S7 Cd4 S5 108.1(6) . 4_765 ?

S8 Cd4 S5 115.0(6) 12 4_765 ?

S2 Cd4 S5 115.6(7) . 4_765 ?

S2 Cd5 S3 112.7(12) . . ?

S2 Cd5 S4 109.5(8) . . ?

S3 Cd5 S4 118.0(12) . . ?

S2 Cd5 S6 111.6(7) . . ?

S3 Cd5 S6 98.8(7) . . ?

S4 Cd5 S6 105.4(4) . . ?

Cd5 S6 Cd5 138.1(12) . 11_655 ?

Cd1 S7 Cd4 109.3(4) . . ?

Cd1 S7 Cd2 108.4(5) . . ?

Cd4 S7 Cd2 110.8(4) . . ?

Cd1 S7 Cd3 108.8(4) . . ?

Cd4 S7 Cd3 109.9(5) . . ?

Cd2 S7 Cd3 109.6(5) . . ?

C5 S8 Cd2 103(4) . . ?

C5 S8 Cd4 107(3) . 12 ?

Cd2 S8 Cd4 110.4(6) . 12 ?

Cd3 S5 Cd4 106.9(7) . 4_765 ?

C7 S4 Cd5 92(5) . . ?

C7 S4 Cd2 107(4) . . ?

Cd5 S4 Cd2 104.1(7) . . ?

Cd5 S3 Cd3 106.6(10) . . ?

Cd5 S2 Cd4 108.3(7) . . ?

Cd3 S1 Cd2 110.7(8) . 9_765 ?

C10 C8 C7 124(6) . . ?

C8 C7 S4 136(7) . . ?

C1 C5 C9 104(6) . . ?

C1 C5 S8 123(7) . . ?

C9 C5 S8 132(7) . . ?

C6 C9 C5 132(9) . . ?

 

_diffrn_measured_fraction_theta_max    0.997

_diffrn_reflns_theta_full              15.42

_diffrn_measured_fraction_theta_full   0.997

_refine_diff_density_max    1.195

_refine_diff_density_min   -1.458

_refine_diff_density_rms    0.410
